# Supplementary material for: The atmospheric oxidation mechanism of 2-methylnaphthalene
Source: Royal Society of Chemistry journal article supplement (doi:10.1039/c5cp02731d), 2015-01-01
Supplement: c5cp02731d1.pdf [file c5cp02731d1.pdf]

**Table S1.** The energies and 298 K Gibbs energies of the intermediate radicals and transition states in reaction of 2MN-1-OH (R1) and O<sub>2</sub> at BH&HLYP and ROCBS-QB3 levels (all in kJ/mol, relative to R1 + O<sub>2</sub>) and T<sub>1</sub>-Diagnostics at ROCCSD/6-31+G(d') level

| Species (R1 = 2MN-1-OH)                  | BH&HLYP         |                   | ROCBS-QB3       |                   | T <sub>1</sub> -Diag |
|------------------------------------------|-----------------|-------------------|-----------------|-------------------|----------------------|
|                                          | $\Delta E_{0K}$ | $\Delta G_{298K}$ | $\Delta E_{0K}$ | $\Delta G_{298K}$ |                      |
| <b>R1-200-a</b>                          | <b>-24.9</b>    | <b>23.4</b>       | <b>-64.6</b>    | <b>-16.3</b>      | <b>0.0201</b>        |
| <b>R1-200-s</b>                          | <b>-19.5</b>    | <b>28.7</b>       | <b>-60.4</b>    | <b>-12.1</b>      | <b>0.0202</b>        |
| <b>R1-400-a</b>                          | <b>-5.7</b>     | <b>37.7</b>       | <b>-37.5</b>    | <b>5.9</b>        | <b>0.0197</b>        |
| <b>R1-400-s</b>                          | <b>-9.5</b>     | <b>37.0</b>       | <b>-45.9</b>    | <b>0.6</b>        | <b>0.0197</b>        |
| R1-500-a                                 | 113.4           | 157.4             |                 |                   |                      |
| R1-500-s                                 | 111.8           | 155.3             |                 |                   |                      |
| R1-700-a                                 | 98.0            | 140.6             |                 |                   |                      |
| R1-700-s                                 | 97.1            | 139.8             |                 |                   |                      |
| R1-900-a                                 | 116.6           | 162.6             |                 |                   |                      |
| R1-900-s                                 | 111.2           | 158.0             |                 |                   |                      |
| <b>TS(R1 + O<sub>2</sub> → R1-200-a)</b> | <b>46.6</b>     | <b>91.7</b>       | <b>-14.0</b>    | <b>31.1</b>       | <b>0.0299</b>        |
| <b>TS(R1 + O<sub>2</sub> → R1-200-s)</b> | <b>42.9</b>     | <b>88.6</b>       | <b>-13.2</b>    | <b>32.5</b>       | <b>0.0314</b>        |
| <b>TS(R1 + O<sub>2</sub> → R1-400-a)</b> | <b>48.5</b>     | <b>91.4</b>       | <b>-5.8</b>     | <b>37.1</b>       | <b>0.0293</b>        |
| <b>TS(R1 + O<sub>2</sub> → R1-400-s)</b> | <b>41.8</b>     | <b>86.6</b>       | <b>-12.8</b>    | <b>32.1</b>       | <b>0.0300</b>        |
| TS(R1 + O <sub>2</sub> → R1-500-a)       | 133.0           | 175.1             |                 |                   |                      |
| TS(R1 + O <sub>2</sub> → R1-500-s)       | 131.6           | 174.1             |                 |                   |                      |
| TS(R1 + O <sub>2</sub> → R1-700-a)       | 124.1           | 165.7             |                 |                   |                      |
| TS(R1 + O <sub>2</sub> → R1-700-s)       | 121.7           | 164.0             |                 |                   |                      |
| TS(R1 + O <sub>2</sub> → R1-900-a)       | 132.4           | 177.2             |                 |                   |                      |
| TS(R1 + O <sub>2</sub> → R1-900-s)       | 124.1           | 171.2             |                 |                   |                      |
| R1-2300-a                                | 34.4            | 82.9              |                 |                   |                      |
| R1-2300-s                                | 29.7            | 77.7              |                 |                   |                      |
| R1-2400-a                                | 41.5            | 91.3              |                 |                   |                      |
| R1-2400-s                                | 33.4            | 83.9              |                 |                   |                      |
| <b>R1-2900-a</b>                         | <b>37.5</b>     | <b>89.1</b>       | <b>-30.7</b>    | <b>20.9</b>       | <b>0.0205</b>        |
| <b>R1-2900-s</b>                         | <b>31.2</b>     | <b>83.0</b>       | <b>-38.0</b>    | <b>13.8</b>       | <b>0.0203</b>        |
| R1-2-10-OO-a                             | 99.8            | 150.8             |                 |                   |                      |
| R1-2-10-OO-s                             | 96.5            | 147.5             |                 |                   |                      |
| R1-3400-a                                | 82.9            | 128.5             |                 |                   |                      |
| R1-3400-s                                | 78.4            | 124.9             |                 |                   |                      |
| R1-4500-a                                | 96.6            | 144.9             |                 |                   |                      |
| R1-4500-s                                | 94.8            | 143.6             |                 |                   |                      |
| R1-4900-a                                | 102.1           | 152.1             |                 |                   |                      |
| R1-4900-s                                | 94.1            | 144.3             |                 |                   |                      |
| R1-4-10-OO-a                             | 130.3           | 178.5             |                 |                   |                      |
| R1-4-10-OO-s                             | 96.5            | 147.5             |                 |                   |                      |
| TS(R1-200-a → R1-2300-a)                 | 97.1            | 145.8             |                 |                   |                      |
| TS(R1-200-s → R1-2300-s)                 | 92.2            | 141.8             |                 |                   |                      |
| TS(R1-200-a → R1-2400-a)                 | 138.9           | 186.7             |                 |                   |                      |
| TS(R1-200-s → R1-2400-s)                 | 131.1           | 181.3             |                 |                   |                      |
| <b>TS(R1-200-a → R1-2900-a)</b>          | <b>95.5</b>     | <b>147.2</b>      | <b>19.3</b>     | <b>71.1</b>       | <b>0.0299</b>        |
| <b>TS(R1-200-s → R1-2900-s)</b>          | <b>80.1</b>     | <b>132.4</b>      | <b>3.6</b>      | <b>55.9</b>       | <b>0.0303</b>        |
| TS(R1-200-a → R1-2-10-OO-a)              | 138.4           | 189.8             |                 |                   |                      |
| TS(R1-200-s → R1-2-10-OO-s)              | 129.1           | 180.9             |                 |                   |                      |
| <b>R1C-2OOH</b>                          | <b>-52.5</b>    | <b>-5.7</b>       | <b>-100.5</b>   | <b>-53.7</b>      | <b>0.0205</b>        |
| R1O-2OOH-a                               | Not Exist       |                   |                 |                   |                      |
| R1O-2OOH-s                               | Not Exist       |                   |                 |                   |                      |

|                                                     |              |              |              |              |               |
|-----------------------------------------------------|--------------|--------------|--------------|--------------|---------------|
| <b>TS(R1-200-<i>a</i> → R1C-200H)</b>               | <b>88.9</b>  | <b>139.2</b> | <b>22.4</b>  | <b>72.6</b>  | <b>0.0260</b> |
| <b>TS(R1-200-<i>a</i> → R1O-200H-<i>a</i>)</b>      | <b>99.2</b>  | <b>150.3</b> | <b>36.4</b>  | <b>87.6</b>  | <b>0.0353</b> |
| <b>TS(R1-200-<i>s</i> → R1O-200H-<i>s</i>)</b>      | <b>89.4</b>  | <b>140.2</b> | <b>20.4</b>  | <b>71.1</b>  | <b>0.0345</b> |
| <b>TS(R1C-200H → 2-MN-1-ol + HO<sub>2</sub>)</b>    | <b>-2.8</b>  | <b>42.1</b>  | <b>-58.3</b> | <b>-13.5</b> | <b>0.0251</b> |
| TS(R1C-200H → 2-OOH-naphth-1-ol + CH <sub>3</sub> ) | 66.3         | 110.5        |              |              |               |
| TS(R1C-200H → 2-MN-23-O-1-OH + OH)                  | 21.7         | 66.7         |              |              |               |
| <b>R1-20-890-<i>s</i></b>                           | <b>-27.0</b> | <b>22.1</b>  | <b>-63.7</b> | <b>-14.6</b> | <b>0.0165</b> |
| <b>R1-90-230-<i>s</i></b>                           | <b>-9.6</b>  | <b>40.1</b>  | <b>-51.0</b> | <b>-1.3</b>  | <b>0.0183</b> |
| <b>TS(R1-2900-<i>s</i> → R1-20-890-<i>s</i>)</b>    | <b>95.5</b>  | <b>151.0</b> | <b>37.7</b>  | <b>90.6</b>  | <b>0.0227</b> |
| TS(R1-2900- <i>s</i> → R1-90-230- <i>s</i> )        | Not Found    |              |              |              |               |
| TS(R1-400- <i>a</i> → R1-2400- <i>a</i> )           | 137.6        | 187.2        |              |              |               |
| TS(R1-400- <i>s</i> → R1-2400- <i>s</i> )           | 131.0        | 181.2        |              |              |               |
| TS(R1-400- <i>a</i> → R1-3400- <i>a</i> )           | 128.0        | 175.2        |              |              |               |
| TS(R1-400- <i>s</i> → R1-3400- <i>s</i> )           | 123.3        | 170.9        |              |              |               |
| TS(R1-400- <i>a</i> → R1-4500- <i>a</i> )           | 149.5        | 198.3        |              |              |               |
| TS(R1-400- <i>s</i> → R1-4500- <i>s</i> )           | 147.7        | 197.1        |              |              |               |
| TS(R1-400- <i>a</i> → R1-4900- <i>a</i> )           | 159.2        | 209.5        |              |              |               |
| TS(R1-400- <i>s</i> → R1-4900- <i>s</i> )           | 150.9        | 202.0        |              |              |               |
| TS(R1-400- <i>a</i> → R1-4-10-OO- <i>a</i> )        | 155.2        | 203.0        |              |              |               |
| TS(R1-400- <i>s</i> → R1-4-10-OO- <i>s</i> )        | 148.3        | 197.2        |              |              |               |
| <b>R1C-400H</b>                                     | <b>-57.2</b> | <b>-12.9</b> | <b>-96.5</b> | <b>-52.1</b> | <b>0.0179</b> |
| <b>TS(R1-400-<i>a</i> → R1C-400H)</b>               | <b>116.0</b> | <b>166.6</b> | <b>41.9</b>  | <b>92.4</b>  | <b>0.0223</b> |
| <b>TS(R1C-400H → 2-MN-1-ol + HO<sub>2</sub>)</b>    | <b>-1.0</b>  | <b>42.5</b>  | <b>-43.1</b> | <b>0.4</b>   | <b>0.0289</b> |

**Table S2.** The energies and 298 K Gibbs energies of the intermediate radicals and transition states in reaction of 2MN-3-OH (R3) and O<sub>2</sub> at BH&HLYP and ROCBS-QB3 levels (all in kJ/mol, relative to R3 + O<sub>2</sub>)

| Species (R2 = 2MN-2-OH)                         | M06-2X          |                   | ROCBS-QB3       |                   | <i>T</i> <sub>1</sub> - <i>Diag</i> |
|-------------------------------------------------|-----------------|-------------------|-----------------|-------------------|-------------------------------------|
|                                                 | $\Delta E_{0K}$ | $\Delta G_{298K}$ | $\Delta E_{0K}$ | $\Delta G_{298K}$ |                                     |
| R3-200- <i>a</i>                                | 59.0            | 105.8             |                 |                   |                                     |
| R3-200- <i>s</i>                                | 75.4            | 120.3             |                 |                   |                                     |
| <b>R3-400-<i>a</i></b>                          | <b>-43.7</b>    | <b>1.4</b>        | <b>-75.0</b>    | <b>-29.8</b>      | <b>0.0202</b>                       |
| <b>R3-400-<i>s</i></b>                          | <b>-40.0</b>    | <b>5.7</b>        | <b>-74.4</b>    | <b>-28.7</b>      | <b>0.0202</b>                       |
| TS(R3 + O <sub>2</sub> → R3-200- <i>a</i> )     | 99.9            | 144.4             |                 |                   |                                     |
| TS(R3 + O <sub>2</sub> → R3-200- <i>s</i> )     | 96.9            | 142.1             |                 |                   |                                     |
| <b>TS(R3 + O<sub>2</sub> → R3-400-<i>a</i>)</b> | <b>36.2</b>     | <b>77.8</b>       | <b>-15.5</b>    | <b>26.2</b>       | <b>0.0309</b>                       |
| <b>TS(R3 + O<sub>2</sub> → R3-400-<i>s</i>)</b> | <b>37.6</b>     | <b>79.2</b>       | <b>-13.9</b>    | <b>27.6</b>       | <b>0.0323</b>                       |
| <b>R3-2400-<i>a</i></b>                         | <b>-47.3</b>    | <b>2.7</b>        | <b>-107.8</b>   | <b>-57.8</b>      | <b>0.0210</b>                       |
| <b>R3-2400-<i>s</i></b>                         | <b>-56.9</b>    | <b>-6.8</b>       | <b>-117.0</b>   | <b>-66.9</b>      | <b>0.0209</b>                       |
| <b>TS(R3-400-<i>a</i> → R3-2400-<i>a</i>)</b>   | <b>44.1</b>     | <b>94.1</b>       | <b>-19.7</b>    | <b>31.1</b>       | <b>0.0263</b>                       |
| <b>TS(R3-400-<i>s</i> → R3-2400-<i>s</i>)</b>   | <b>30.5</b>     | <b>80.7</b>       | <b>-32.4</b>    | <b>18.2</b>       | <b>0.0269</b>                       |
| TS(R3-400- <i>a</i> → R3C-400H)                 | 69.8            | 66.2              |                 |                   |                                     |
| TS(R3-400- <i>a</i> → R3O-200H- <i>a</i> )      | 68.8            | 53.3              |                 |                   |                                     |
| TS(R3-400- <i>s</i> → R3O-200H- <i>s</i> )      | 79.6            | 67.6              |                 |                   |                                     |
| R3-40-120- <i>s</i>                             | -163.5          | -155.2            |                 |                   |                                     |
| TS(R3-2400- <i>s</i> → R3-40-120- <i>s</i> )    | 14.2            | 64.4              |                 |                   |                                     |
